# Supplementary material
Source: PubMed Central journal article supplement (PMC8758553)
Supplement: NIHMS1764041-supplement-Supplemental.pdf [file NIHMS1764041-supplement-Supplemental.pdf]

1 Supplemental Material

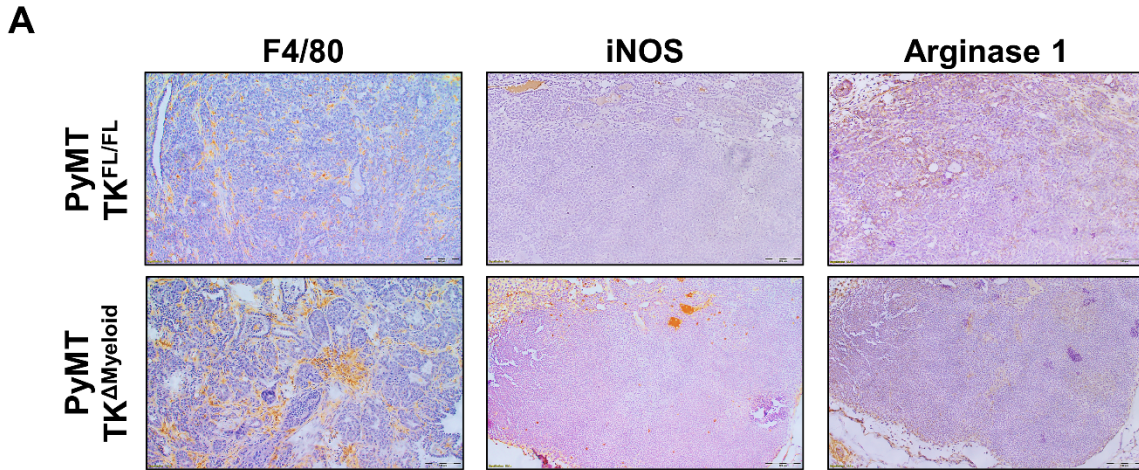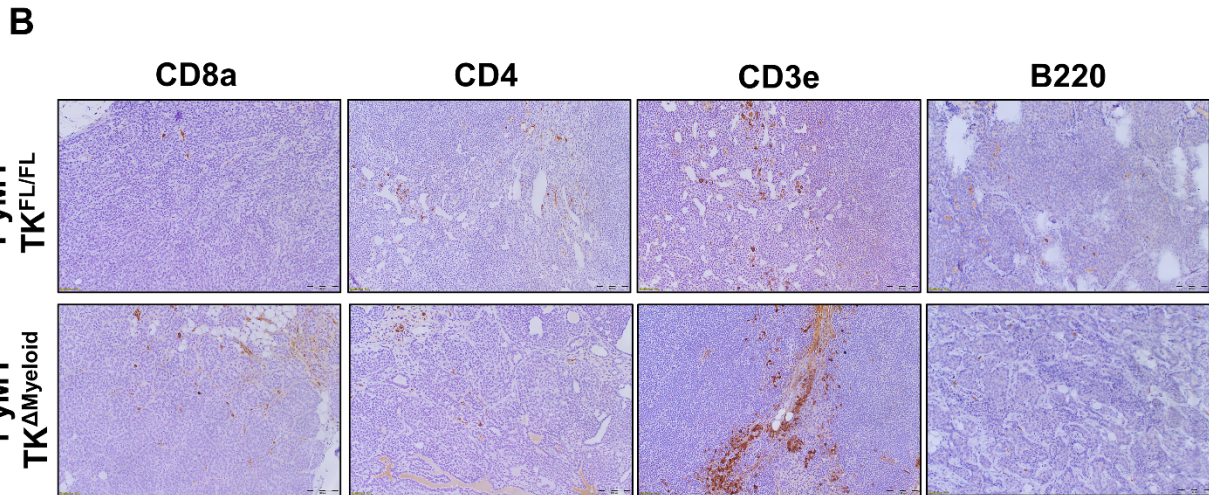

2

3 **Supplemental Figure S1. A)** Representative images of PyMT TK<sup>FL/FL</sup> and PyMT TK<sup>ΔMyeloid</sup> tumors  
4 stained for **A)** F4/80, iNOS, and Arginase 1; and **B)** CD8a, CD3e, CD4, and B220. Scale  
5 bars=100μm; n=3-8 tumors per group; n=3-5 fields per tumor were analyzed.

6

A

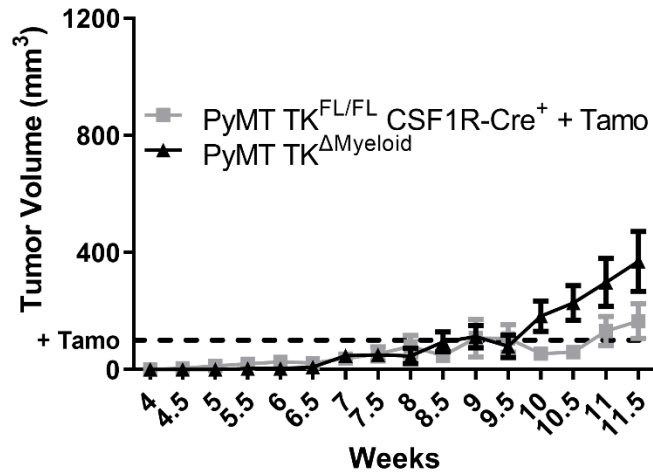

B

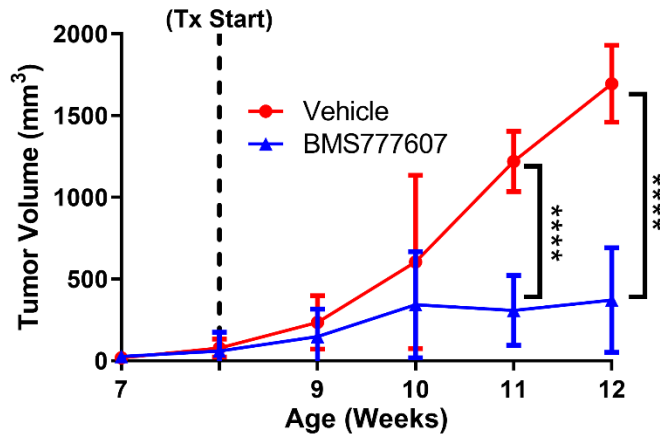

7

8 **Supplemental Figure S2. A)** Average tumor growth curves of PyMT TK<sup>FL/FL</sup> CSF1R-Cre<sup>+</sup> (n=10)

9 mice with tamoxifen (Tamo) treatment and PyMT TK<sup>ΔMyeloid</sup> (n=27) mice. Tamoxifen treatment was

10 initiated when tumors reached 100mm<sup>3</sup> (denoted by the dashed line). **B)** Average tumor growth

11 curves of PyMT WT (n=27) and PyMT WT + BMS-777607 (n=5) mice. Statistical significance was

12 determined using a two-way ANOVA with corrected multiple t tests. Data represent average

13 values ± SD. \*P<0.05. Chemical inhibition of RON in PyMT TK<sup>+/+</sup> mice was performed with 50

14 mg/kg/day BMS-777607 (Selleck Chemical) treatment via oral gauge, starting at 8 weeks of age

15 (when palpable tumors reach a measurable size).

16

**A** Dio-labelled tumor cell (R7) based BrdU gating strategy for co-cultures

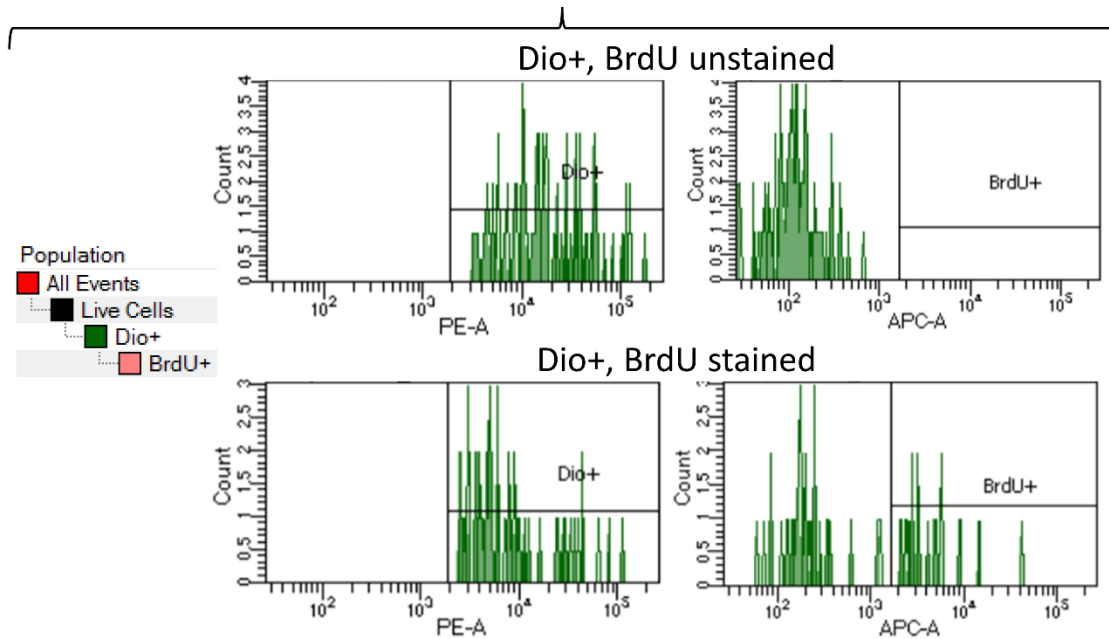

**B** Dio-labelled tumor cell (R7) based Annexin/PI gating strategy for co-cultures

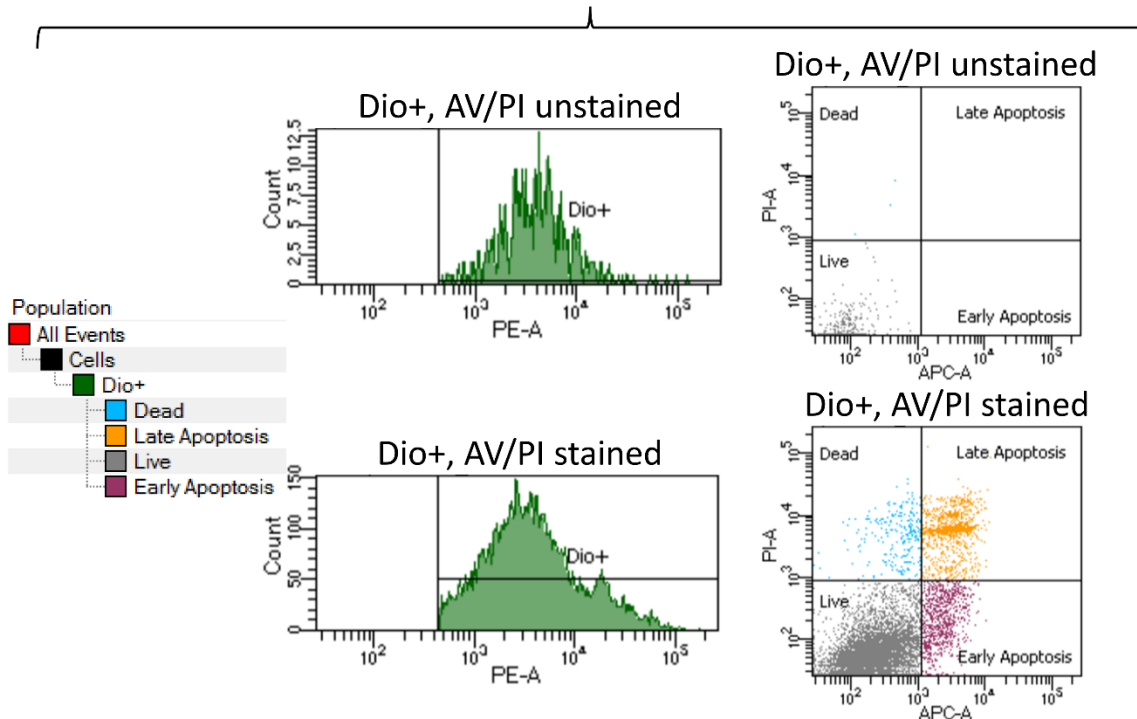

17

18 **Supplemental Figure S3.** Representative flow cytometry gating strategies for tumor

19 cell/macrophage co-culture. Using Dio fluorescent labeling of tumor cells prior to macrophage co-

20 culture, tumor cells were resolved from the mixed culture by gating on Dio fluorescence to  
21 examine **A)** tumor cell proliferation via BrdU incorporation and **B)** tumor cell apoptosis/cell death  
22 via Annexin V/PI expression.

23

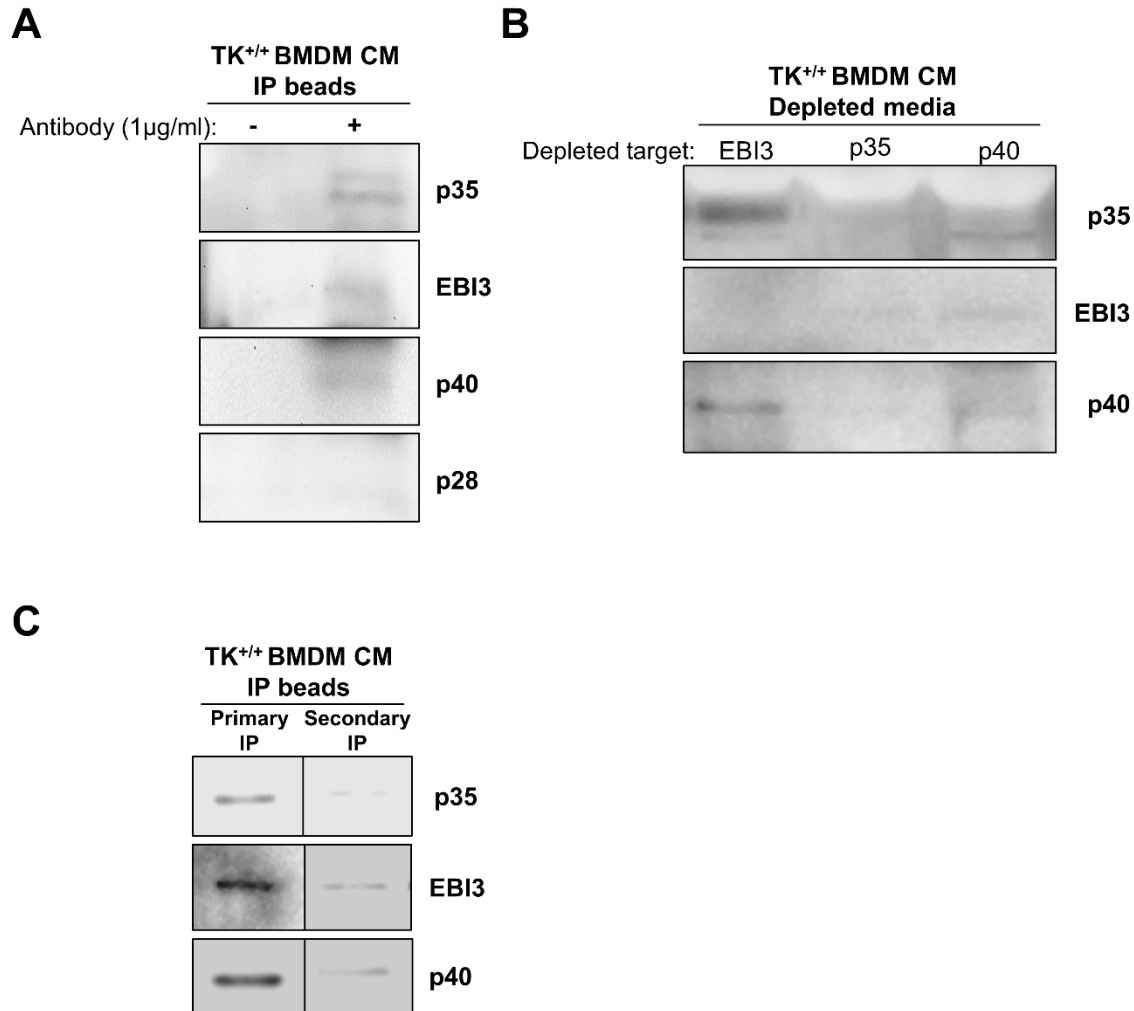

24

25 **Supplemental Figure S4. A)** Representative Western blot images showing the

26 immunoprecipitation of p35, EBI3, p40, and p28 in TK<sup>+/+</sup> BMDM CM with (+) and without (-)

27 antibody depletion (n=3). Depletion of p35, EBI3, p40, and p28 subunits from TK<sup>+/+</sup> BMDM CM

28 was performed by rotating BMDM conditioned media with 1µg/ml antibody and protein A/G

29 agarose beads (SCBT). Following incubations with antibody and beads, the depleted CM was

30 used for treatment. Western blot shown using proteins eluted from beads. Incubation with beads

31 without antibody served as the control. **B)** Representative Western blot images showing p35, p40,

32 and EBI3 expression from concentrated TK<sup>+/+</sup> CM that was depleted for EBI3, p35, or p40. CM

33 samples were concentrated (approximately 10 fold) using Amicon Ultra-4 Ultracel 3K Centrifugal

34 filters (Millipore Sigma) as per manufacturer's recommendations. **C)** Representative Western blot

35 images of pulled down target protein showing p35, p40, and EBI3 levels following primary IP pull  
36 down and a second sequential IP pull down in respective lanes.  
37

38 **Supplemental Table S1. Primers for Genotyping**  
 39

|                   | <b>Gene</b>      | <b>Primers</b>                                                                                                       |
|-------------------|------------------|----------------------------------------------------------------------------------------------------------------------|
| <b>Genotyping</b> | <i>PyMT</i>      | 5'-GGAAGCAAGTACTTCACAAGGG-3'<br>5'-GGAAAGTCACTAGGAGCAGGG-3'                                                          |
|                   | <i>Ron Flox</i>  | 5'-TCATTTGAATCAGTCCCCTCACTTTTCTCC-3'<br>5'-GGAACCAGTACACAGATGAGTAAACTGAGC-3'<br>5'-TCGCTCAAGCCCAGGCAGGGCCTCACAGAG-3' |
|                   | <i>Lys-Cre</i>   | 5'-TTACAGTCGGCCAGGCTGAC-3'<br>5'-CTTGGGCTGCCAGAATTTCTC-3'<br>5'-CCCAGAAATGCCAGATTACG-3'                              |
|                   | <i>CSF1R-Cre</i> | 5'-AGATGCCAGGACATCAGGAACCTG-3'<br>5'-ATCAGCCACACCAGACACAGAGATC-3'                                                    |

40  
41

42 **Supplemental Methods**

43

44 **RNA-Sequencing (RNA-Seq)**

45 RNA-Seq analysis was performed in GeneSpring NGS software (Agilent Technologies). First,  
46 sequences were aligned to the mouse reference genome (mm9), which aligns reads spanning  
47 known or novel splice junctions. The reference annotations were produced by the Ensembl  
48 project<sup>1</sup>. Multiple mapping reads were removed and aligned reads were filtered on base quality,  
49 with a quality threshold  $\geq 30$  and zero 'Ns' allowed in each read. The aligned gene read counts  
50 were quantified and used to compute reads per kilobase per million reads (RPKMs) for each  
51 transcript in each sample. Raw counts were normalized using the DESeq algorithm, threshold set  
52 to 1, and base lined to the median of control samples. Further filtration was applied, requiring at  
53 least 3 RPKM in each sample of at least one experimental condition, yielding 13,949 transcripts.

54

55
